## RESEARCH ARTICLE

# Enhancing bulb yield through nitrogen fertilization and the use of hybrid onion (*Alluim cepa* L.) varieties in northwest Ethiopia

Yebirzaf Yeshiwas <sup>\*</sup>, Melkamu Alemayehu, Enyew Adgo

Bahir Dar University College of Agriculture and Environmental Sciences, Bahir Dar, Ethiopia

\* [yebirzafy@gmail.com](mailto:yebirzafy@gmail.com)

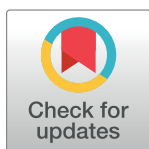

## Abstract

Onions are among the most important cash crops in developing countries, including Ethiopia. However, its production and productivity are very low, which is associated with inappropriate fertilization and the use of low-yielding varieties. Therefore, the present study was conducted to evaluate the effects of the nitrogen fertilizer rate on the growth, yield, and quality of hybrid onion varieties in northwest Ethiopia. The experiment was conducted at three locations (Koga, Woreta, and Woramit) during the 2021/2022 cropping season under irrigated conditions. The treatments consisted of three hybrid onion varieties (Russet, Jambar, Red Coach) and one open-pollinated onion variety (Bombay Red) and four nitrogen rates (0, 41, 82, and 123 kg ha<sup>-1</sup>), which were laid out in a randomized complete block design with a factorial arrangement of 4\*4 in three replications. The results of the present study revealed that onion growth, yield and quality were influenced by the nitrogen fertilizer rate and onion variety across all locations. Compared with the open pollinated Bombay Red variety, the hybrid varieties (Russet and Jambar) performed well in terms of bulb diameter, bulb weight, total yield, marketable bulb yield, and pungency. Nitrogen fertilizer applied at a rate of 82 kg ha<sup>-1</sup> resulted in the highest growth and yield parameters of onion. The Russet and Jambar varieties recorded the highest marketable bulb yields of 26.50 t ha<sup>-1</sup> and 24.57 t ha<sup>-1</sup>, respectively. Onion varieties treated with the highest nitrogen fertilizer dosage of 123 kg ha<sup>-1</sup>, particularly the Bombay Red variety, exhibited the longest duration to reach maturity. Onion plants supplied with 82 kg ha<sup>-1</sup> nitrogen presented the highest marketable bulb yields, with a value of 26.77 t ha<sup>-1</sup>. Too much nitrogen above 82 kg ha<sup>-1</sup> leads to decreased yield; hence, excess nitrogen is lost to the environment. Furthermore, the Jambar and Russet hybrid varieties and the application of 82 kg ha<sup>-1</sup> nitrogen fertilizers provided the highest net benefit. The hybrid varieties Jambar and Russet and the application of 82 kg ha<sup>-1</sup> nitrogen fertilizer can be recommended for onion production in the study area and areas with similar agroecosystems. Since this study is the first of its kind, considering other hybrid onion varieties and optimizing agronomic practices such as spacing and phosphorus fertilizer are also recommended in future research.

## OPEN ACCESS

**Citation:** Yeshiwas Y, Alemayehu M, Adgo E (2024) Enhancing bulb yield through nitrogen fertilization and the use of hybrid onion (*Alluim cepa* L.) varieties in northwest Ethiopia. PLoS ONE 19(10): e0312394. <https://doi.org/10.1371/journal.pone.0312394>

**Editor:** Randall P. Niedz, United States Department of Agriculture, UNITED STATES OF AMERICA

**Received:** April 9, 2024

**Accepted:** October 4, 2024

**Published:** October 24, 2024

**Copyright:** © 2024 Yeshiwas et al. This is an open access article distributed under the terms of the [Creative Commons Attribution License](https://creativecommons.org/licenses/by/4.0/), which permits unrestricted use, distribution, and reproduction in any medium, provided the original author and source are credited.

**Data Availability Statement:** The data used for this study attached as [supplementary material](#).

**Funding:** This research was financially supported by the European Commission Horizon 2020, Healthy Food Africa Project, Food System Lab Bahir Dar (FSL-BD) (grant received by YY) at Bahir Dar University, Ethiopia, under the Grant Agreement No. 862740.

**Competing interests:** The authors have declared that no competing interests exist.

## 1 Introduction

Onion (*Allium cepa* L.) is a vital vegetable crop worldwide [1]. It can be grown in different climatic zones and is widely cultivated for its edible bulbs and lower stem sections [2]. It was first introduced to the Ethiopian agricultural system in the 1970s by foreigners [3]. Onions are used to flavor and season a wide variety of dishes and are valued for their medicinal properties in many communities, including potential health benefits to minimize high blood pressure and reduce the risk of cancer, other heart diseases, and diabetes. Onions are rich in essential nutrients such as vitamin C, B6, biotin, chromium, calcium, and dietary fiber. When onions are sliced or crushed, they release an enzyme called alliinase, which leads to tearing or crying [4–6].

Onions are being grown in more than 130 countries around the world. The annual global production and productivity of onion are 99.97 million tonnes and  $19.25 \text{ t ha}^{-1}$ , respectively [7]. China is the world's top producer, followed by India and the US. In Africa, Egypt is the leading country, producing 22.08 million tons of onion per year for domestic and international markets, ranking fourth among world producers. Ethiopia ranks as the third largest onion producer on the African continent, trailing behind Egypt and South Africa [8]. Onion is mostly produced by small-scale farmers as a cash crop in Ethiopia. Despite the presence of a suitable environment and edaphic conditions, the production and productivity of onion in the country are very low. According to the CSA [9], the annual production and productivity of onion in Ethiopia are 346048.1 tons and  $8.88 \text{ t ha}^{-1}$ , respectively. This is significantly lower than the potential yield of  $40 \text{ t ha}^{-1}$  achieved under research station conditions [9]. Farmers in Ethiopia use open-pollinated varieties with low yields (Bombay Red and Adama Red). They also practice improper agronomic practices, including inappropriate soil fertility management [10,11]. These similar malpractices contribute to the low level of onion productivity and bulb qualities, such as total soluble solids (brix) and pungency, which exist in Ethiopia, affecting market potential and consumer preference.

Successful onion production depends on several factors, including the selection of adaptable high yielder varieties suited to local conditions, the implementation of proper agronomic practices and the reduction of postharvest losses [11,12]. Compared with open-pollinated varieties, hybrid onion varieties generally boast greater yield potential, offering uniform bulb sizes and enhanced storability, thereby extending shelf-life [13–15]. In the context of improving onion production in northwest Amhara Ethiopia, various hybrid varieties such as Russet, Red Coach, and Jambar have been introduced into the local farming system. These varieties were selected due to their high yield potential and better storability compared to open pollinated varieties. Preliminary trials and research conducted in similar agro-climatic regions have shown that these varieties adapted and perform well under local conditions of northwest Amhara Ethiopia [11]. However, despite their introduction, the full production technologies, particularly regarding their specific nitrogen fertilizer requirements, has not been comprehensively studied and require interventions.

Fertilization should aim to improve onion productivity and quality with respect to nutrient requirements related to optimal yield at a minimum cost and high efficiency of fertilization use [16]. Compared with most other crops, onion plants have shallow and unbranched roots, which increase their vulnerability to nutritional deficiencies [17]. Consequently, onions require a relatively high level of nitrogen and respond well to supplemental nitrogen fertilizer [17,18]. The rate of fertilizer application depends on various factors, such as the crop type, environmental conditions, soil fertility status, method of fertilization, and yield potential of the crop [19,20]. Dinega et al. [21] reported that intensifying nitrogen fertilizer management can improve yield and bulb quality in onion.

Table 1. Geographical locations and environmental conditions of the experimental sites (long years average).

| Location | Lat. (N) | Long.(E) | Altitude (m.a.s.l) | Average (°C) |      | Rainfall (mm) | Soil texture |
|----------|----------|----------|--------------------|--------------|------|---------------|--------------|
|          |          |          |                    | Min.         | Max  |               |              |
| Woramit  | 11°38'   | 37°10'   | 1800               | 13           | 25.5 | 1248.8        | Nitisole     |
| Koga     | 11°20'   | 37°7'    | 1953               | 9.7          | 26.8 | 1300–1380     | Nitisole     |
| Woreta   | 11°55'   | 37°42'   | 1828               | 12           | 28   | 1250          | Vertisole    |

<https://doi.org/10.1371/journal.pone.0312394.t001>

Although exogenous nitrogen application is known to increase onion yield, many researchers have reported that the application of high levels of nitrogen fertilizer leads to a reduction in the storage life of onion bulbs [22]. Excessively high doses of nitrogen also cause a delay in bulb maturity and encourage bolting, which is an undesirable characteristic [23]. Moreover, according to Khan et al. [24], a low rate of nitrogen causes a low yield of onions due to a shortage of nitrogen required for the chlorophyll pigment that is responsible for photosynthesis. Excessive nitrogen is hazardous to the environment, weakens foliage and predisposes plants to pathogenic diseases [25]. The application of the optimal nitrogen fertilizer rate is therefore essential in onion production [21,26]. In this context, this study aimed to optimize nitrogen fertilizer rates for the economical production of hybrid onion varieties in northwestern Ethiopia.

## 2. Materials and methods

### 2.1. Description of the study area

Field experiment was carried out at three locations, namely, the North Mecha (Koga), Fogera (Woreta) and Bahir Dar Zuria (Woramit) districts of the Amhara region, during the 2021–2022 irrigation season. The geographical locations, altitudes, average, minimum and maximum temperatures, rainfall, and soil types of the districts are presented in Table 1. The average maximum and minimum temperatures of Woreta and Woramit during the experimental period were 29°C and 17.8°C and 28°C and 12.4°C, respectively. The Koga experimental site had the mean maximum and minimum temperature of 28.8°C and 9.5°C, respectively, as indicated in Fig 1 [27].

**Selected properties of the soil in the experimental locations.** Soil samples from the experimental sites were collected via standard procedures prior to planting at each site. A composite soil sample was taken before the experimental plot was plowed by mixing samples collected at eight different locations along the two diagonal lines of the field at 0–20 cm depth via an auger. The physical and chemical properties of the composite soils from each location were analyzed at the Soil and Plant Nutrition Laboratory of the College of Agricultural and Environmental Sciences, Bahir Dar University. The results of the soil analysis are presented in Table 2.

The textural class of the experimental soil was found to be sandy clay loam in Koga, clay loam in Woramit and clay in Woreta, with pH values of 5.4, 5.69 and 6.06, respectively. The pH of Woreta falls within the optimal range, whereas those of Koga and Woramit are slightly acidic and are within a preferred range for most crops. The electrical conductivity values of the experimental soils are within acceptable limits for onions, indicating that the sites had low salinity levels. The organic matter content of the site is in the medium range (2–4%) for Ethiopian soils. The total nitrogen content of the soils was found to be high in Koga and low in Woreta and Woramit. The Olsen extractable available phosphorus (P) content of the soil was 10.02 mg kg<sup>-1</sup> in Koga (rated as medium), 20.24 mg kg<sup>-1</sup> in Woramit (rated as medium), and 6.48 mg kg<sup>-1</sup> in Woreta (rated as low). The cation exchange capacity of the soil was 27, 26, and 41, ranging from medium to high (Table 2).

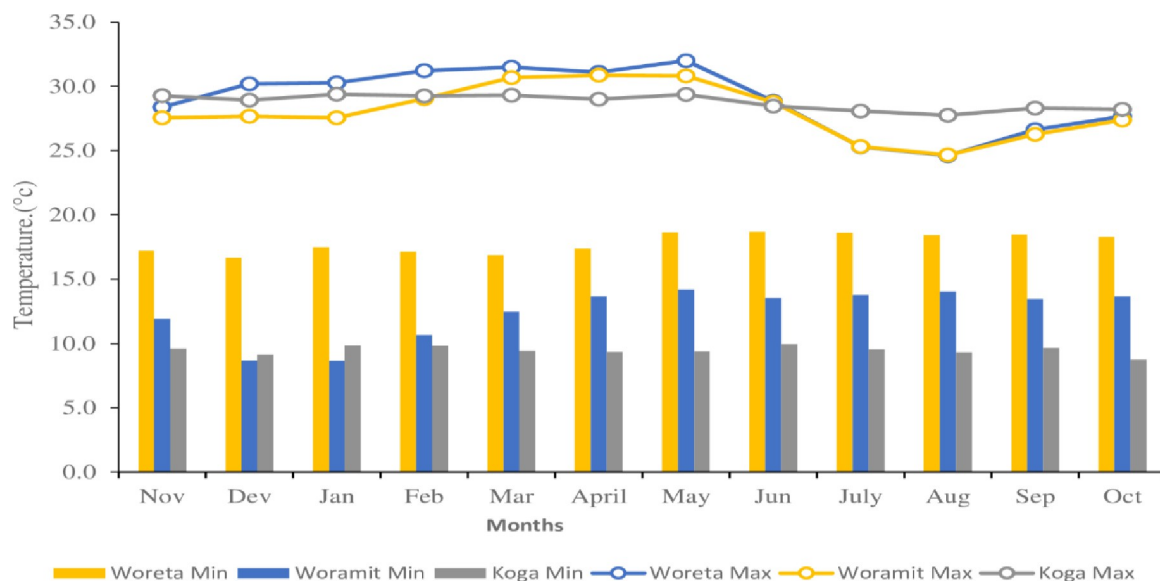

**Fig 1. Minimum (lower) and maximum (upper) temperatures of the testing sites during the cropping season of 2021/2022.** Source: Regional Meteorological Station [27].

<https://doi.org/10.1371/journal.pone.0312394.g001>

## 2.2. Experimental materials

Three hybrid F<sub>1</sub> onion varieties, Russet, Red Coach, and Jambar, and one open pollinated Bombay Red variety as local check, were used as treatments in the present study. The seeds of the hybrid varieties were collected from commercial suppliers (Eshet Agricultural Input Supplier), while the Bombay Red variety seeds were obtained from the Melkassa Agricultural Research Center (MARC). The onion varieties were selected on the basis of the results of the preliminary pilot survey in which the farmers preferred them on the basis of their growth and yield performance. The general characteristics of the selected onion varieties are presented in Table 3.

**Table 2. Status of nutrients in the experimental locations before planting in 2021/2022 irrigation season.**

| Soil properties                             | Soil Sample     |           |        |
|---------------------------------------------|-----------------|-----------|--------|
|                                             | Koga            | Woramit   | Woreta |
| <b>Texture</b>                              |                 |           |        |
| Sand (%)                                    | 56              | 44        | 43     |
| Silt (%)                                    | 16              | 24        | 15     |
| Clay (%)                                    | 28              | 32        | 42     |
| Textural class                              | Sandy Clay Loam | Clay Loam | Clay   |
| pH <sub>H<sub>2</sub>O</sub> (1:2.5)        | 5.40            | 5.69      | 6.02   |
| EC (μS/cm)                                  | 161.30          | 89.10     | 74.00  |
| Organic Carbon (%)                          | 2.18            | 1.72      | 1.33   |
| Organic Matter (%)                          | 3.77            | 2.96      | 2.29   |
| CEC (cmol (+) kg <sup>-1</sup> )            | 27.60           | 26.00     | 41.40  |
| Total Nitrogen (%)                          | 0.42            | 0.17      | 0.18   |
| Available Phosphorus (mg/kg) [Olsen method] | 10.02           | 20.24     | 6.48   |

where: EC = electrical conductivity; CEC = cation exchange capacity.

<https://doi.org/10.1371/journal.pone.0312394.t002>

Table 3. List of varieties and their descriptions.

| Variety name             | Year of release/registration | Area of adaptation |               | Maturity days |
|--------------------------|------------------------------|--------------------|---------------|---------------|
|                          |                              | Altitude (m)       | Rainfall (mm) |               |
| Russet F <sub>I</sub>    | 2013                         | 1500–2200          | Irrigated     | 90–110        |
| Red Coach F <sub>I</sub> | 2015                         | 500–2200           | Irrigated     | 107–120       |
| Jambar F <sub>I</sub>    | 2011                         | 1000–2500          | Irrigated     | 90–110        |
| Bombay Red               | 1980                         | 700–2000           | Irrigated     | 110–120       |

Source: MoARD [28–30].

<https://doi.org/10.1371/journal.pone.0312394.t003>

### 2.3. Treatments and experimental design

The treatments consisted of four onion varieties (Russet, Red Coach, Jambar and Bombay Red), four nitrogen fertilizer rates (0 kg ha<sup>-1</sup>, 41 kg ha<sup>-1</sup>, 82 kg ha<sup>-1</sup>, and 123 kg ha<sup>-1</sup>), and three locations. The treatments were laid out in a randomized complete block design (RCBD) in a 4\*4 factorial arrangement with three replications. Each treatment combination was randomly assigned to the experimental units within a block at each location. In total, 16 treatments were used in the experiment. The total plot size of the experiment was 1.6 m × 1.6 m (2.56 m<sup>2</sup>), while the net plot size was 1.8 m<sup>2</sup>. The blocks were separated by one meter, and the space between each plot within a block was 0.5 m.

### 2.4. Experimental procedures

Seeds of each variety were sown on well-prepared raised beds and mulched with straw. After germination, the mulching material was removed. Watering was done using a fine watering can where the frequency was determined on the basis of climatic conditions. The seedlings were maintained for 55 days after sowing and hardened before being transplanted to the field. This was done by reducing the frequency of watering and making the soil have a low moisture status when the seedlings were ready for field planting.

Healthy and vigorous 12–15 cm tall seedlings were carefully raised for transplanting. The selected seedlings were transplanted in January 2022 with a recommended double row spacing of 40 cm × 20 cm × 10 cm [28].

All agronomic practices were applied according to the recommendation made for onion [28]. The nitrogen fertilizer based on the rates of the treatments was applied in the form of urea (46% N) in two equal splits, where the first 50% of the nitrogen was applied 15 days after transplanting, while the remaining 50% was applied one month after transplanting. Triple superphosphate (46% P<sub>2</sub>O<sub>5</sub>) was used as a source of phosphorus and was applied at a rate of 92 kg ha<sup>-1</sup> P<sub>2</sub>O<sub>5</sub> at the time of uniform transplantation for all the plots [31].

Irrigation water was applied at four-day intervals via furrow irrigation for the first four weeks and then extended to seven-day intervals until the physiological maturity stage. The application of irrigation water was completely stopped 15 days before harvesting for curing purposes. Onion bulbs were harvested when 70% of the plants in each plot showed neck fall [28,32].

### 2.5. Data collection

Measurements of onion growth, yield, and quality parameters were recorded from the central four rows of the net plot area at the physiological maturity stage and harvesting time. Plant height, leaf number per plant and leaf diameter were measured from ten randomly selected

plants from the central four rows in each plot, whereas days to physiological maturity, bulb diameter, average bulb weight, total, marketable, and unmarketable bulb yields were collected in the net plot area.

**Plant height (cm)** was measured using ruler from the soil surface to the tip of the longest mature leaves at physiological maturity. **Leaf number per plant:** the total number of leaves per plant at physiological maturity. **Leaf diameter (cm):** refers to the maximum diameter of the longest leaf measured with a caliper at the widest point of the leaf. **Days to physiological maturity** refers to the actual number of days from transplanting to a day at which more than 70% of the plants in a plot showed yellowing of leaves. **Bulb diameter (cm)** was measured at harvest via a digital Vernier caliper at the widest point in the middle portion of the mature bulb. **The average bulb weight (g)** was computed by weighing ten marketable bulbs together and recording the average value in grams per plant using in [Eq 1] [32].

$$ABW = \text{Total bulb weight} / \text{Total bulb number} \quad [1]$$

**The total bulb yield (ton ha<sup>-1</sup>)** was the sum of total marketable and unmarketable bulbs and was computed on the basis of the weight of mature bulb yield per net plot area and expressed in tons per hectare basis. **The marketable bulb yield (ton ha<sup>-1</sup>)** was determined after discarding bulbs smaller than 20 g, which were split, damaged, rotted and discolored. **The unmarketable bulb yield (ton ha<sup>-1</sup>)** was determined by categorizing the bulb as follows: undersized (<20 g), diseased, decayed, and physiologically disordered, such as split, were weighed and expressed as unmarketable bulbs. **Total soluble solid (TSS) (°Brix): TSS content** was determined via the procedures described by Waskar *et al.* [33]. The juice of the sample bulbs was extracted via a juice extractor, and the extracted juices were filtered using sieve. The TSS was determined using ATAGO® PR-32α with a range of 0 to 32% by placing one to two drops of clean juice on the prism at a monthly interval. The refractometer was standardized with distilled water (0% TSS). The prism of the refractometer was washed with distilled water and dried before the next use. **Firmness (Newton):** was determined with a portable fruit penetrometer (GY-4 model S/N G2001707622) using an 8 mm stainless steel punch. The bulb was penetrated at two opposing points on its equatorial region, then the average of the two measurements was taken. It was measured as the force in Newtons required to penetrate the scale. **Pungency (D. mol/ml)**—content of pyruvic acid developing in homogenized bulb tissue was used as measure of pungency following the modified procedure of Anthon and Barrett [34].

## 2.6. Data analysis

The collected data were first checked for meeting with all ANOVA assumptions (normality and homogeneity) after the Leven homogeneity test. Data were subjected to analysis of variance (ANOVA) using the PROC GLM model of SAS computer software version 9.0 (SAS Institute Inc., 2008).

Following Leven's homogeneity test, a combined analysis of variance was performed using the SAS PROC MIXED procedure. The nitrogen fertilizer rate and variety were considered as fixed effects, whereas locations were considered as a random effect. Whenever ANOVA was significant ( $P < 0.05$ ), mean separation was carried out using least significant difference (LSD) tests [35]. Multiple regression analysis was conducted to determine nitrogen coefficients to develop the model using the PROC REG procedure for marketable bulb yield. The quadratic fit model was used to estimate the optimum values of nitrogen above which no additional net returns were predicted.



## 2.7. Partial budget analysis

Partial budget analysis following the procedures described by CIMMYT [36] was performed to evaluate the economics of the treatments. The marketable yield was downscaled by 10% since the experimental yields are usually higher than those of farmers. The gross benefits of the treatments were estimated by multiplying the adjusted marketable bulb yield with the farm-gate price (20.00 Birr kg<sup>-1</sup>) of onion bulb prevailing in the study area during harvest. The price of urea fertilizer in local marketplaces was 32.50 ETB kg<sup>-1</sup>. Furthermore, the prices of onion seeds (Russet and Jambar 16,000 ETB kg<sup>-1</sup>, Red Coach 13,000 kg<sup>-1</sup>, and Bombay Red 2,500 ETB kg<sup>-1</sup>) and labor cost (150.00 ETB day<sup>-1</sup>) for fertilizer application were used to calculate gross incomes and variable costs. Seed cost, labor cost and urea fertilizer cost are considered variable costs that change with the treatment. The sum of these costs was considered as the total variable cost of the treatment. Net benefits from treatments were obtained by deducting total variable costs from gross benefit on a hectare basis, as indicated by CIMMYT [36].

## 3. Results and discussion

### 3.1. Effects of the nitrogen fertilizer rate on the phenology and vegetative traits of onion varieties

The main effects of variety and nitrogen rate significantly ( $P < 0.01$ ) influenced days to physiological maturity, plant height, and leaf number plant<sup>-1</sup>. However, the two-way interactions between variety and nitrogen did not influence ( $p > 0.05$ ) the number of days needed for the physiological maturity of the onion (S1 Table).

The Russet onion variety matured earlier (94.7 days), whereas Bombay Red took the longest number of days (108.47) to achieve physiological maturity across the three locations (Table 4). The variation in the days required to reach maturity between onion varieties could be due to their genetic differences. Different scholars have reported similar results, where varieties differ in the number of days required to reach physiological maturity [37–39]. The application of fertilizer also significantly extended the physiological maturity of onion across locations.

Compared with those in the other treatments, onion plants supplied with 123 kg ha<sup>-1</sup> nitrogen required the longest days (104.22 days) to reach physiological maturity, whereas onion plants without nitrogen fertilizer matured earlier (100.13 days) (Table 4). This could be attributed to the effects of nitrogen, which extends the vegetative growth period, which in turn delays the physiological maturity of onion plants. Nitrogen fertilizer also increases vegetative growth, which increases the interception of solar radiation and consequently prolongs the number of days needed to reach physiological maturity [40]. The results of the present study are in agreement with the findings of different scholars who reported excessive vegetative growth and delayed onion maturity with the application of relatively high levels of nitrogen fertilizer [17,41,42]. Similarly, Kebede [43] reported that shallot plants were influenced by nutrients and that increased nitrogen fertilizer rates enhanced vegetative growth, delayed maturity, and reduced bulblet size.

The results of the main effects indicated that the Jambar variety, Bombay Red, and Red Coach presented the highest and statistically similar plant heights, with measurement values of 51.12cm, 51.42cm, and 50.17cm, respectively. However, the Russet variety (48.14cm) recorded the lowest plant height (Table 4). The differences in plant height among the varieties could be attributed to genotypic differences, which is in line with previous findings [38,44–47]. The authors reported significant differences in plant height between onion cultivars because of their genetic variations. Compared with the hybrid Russet variety, the open-pollinated Bombay Red variety presented the longest plant height. This could be attributed to the specific breeding

Table 4. Effects of variety, nitrogen fertilizer on maturity and growth of the onion across the locations.

| Variety                              | Days to physiological maturity (Days) | Plant height (cm) | Leaf number plant <sup>-1</sup> |
|--------------------------------------|---------------------------------------|-------------------|---------------------------------|
| Russet                               | 94.69 <sup>c</sup>                    | 48.42b            | 9.02bc                          |
| Jambar                               | 100.97 <sup>b</sup>                   | 50.17a            | 9c                              |
| Red Coach                            | 101.72 <sup>b</sup>                   | 51.12a            | 9.44ab                          |
| Bombay Red                           | 108.47 <sup>a</sup>                   | 51.42a            | 9.69a                           |
| <i>P values</i>                      | **                                    | **                | **                              |
| LSD <sub>0.05</sub>                  | 3.27                                  | 1.70              | 0.41                            |
| <b>Nitrogen (kg ha<sup>-1</sup>)</b> |                                       |                   |                                 |
| 0                                    | 100.13 <sup>b</sup>                   | 46.48c            | 8.63c                           |
| 41                                   | 100.55 <sup>b</sup>                   | 50.23b            | 9.09b                           |
| 82                                   | 100.94 <sup>b</sup>                   | 52.03a            | 9.61a                           |
| 123                                  | 104.22 <sup>a</sup>                   | 51.42a            | 9.82a                           |
| <i>P values</i>                      | **                                    | **                | **                              |
| LSD <sub>0.05</sub>                  | 2.7                                   | 3.66              | 0.41                            |
| CV (%)                               | 5.6                                   | 15.61             | 11.95                           |

Where

\*\*\* =  $p < 0.001$

\*\* =  $P < 0.01$ ; and  $Ns = P > 0.05$ . Means followed by the same letter within the same column are not significantly different at the 5% probability level; LSD<sub>0.05</sub> = least significant difference at the 5% probability level; and CV = coefficient of variation.

<https://doi.org/10.1371/journal.pone.0312394.t004>

goals in which hybrids are prioritized for improved bulb yield rather than excessive vegetative growth compared with certain open-pollinated varieties [48,49].

The onion plants supplied with 123 kg ha<sup>-1</sup> nitrogen recorded the longest plant height, which was statistically similar to the heights recorded with the application of 82 kg ha<sup>-1</sup> nitrogen. The lowest mean plant height (46.48cm) was recorded for the plants grown without nitrogen fertilizer (Table 4). The application of 82 kg ha<sup>-1</sup> nitrogen increased the plant height by approximately 11.9% compared with that of the plants grown without nitrogen. However, a further increase in the nitrogen rate did not significantly affect the height of the plant. The application of nitrogen plays a crucial role in cell division, elongation, and improvement of vegetative growth through increased photosynthetic areas of plants, including onions. The improvement in onion plant height through the application of nitrogen fertilizer has also been reported by different scholars [50–56].

The analysis revealed that the highest average leaf number per plant was recorded for the Bombay Red and Jambar varieties, with values of 9.69 and 9.44, respectively, which were statistically similar to each other. On the other hand, the lowest number of leaves per plant (9.0) was recorded from the Red Coach variety at the three locations, as indicated in Table 4. The difference in the number of leaves per plant could be due to the difference in the inherent genetic makeup of the onion varieties. The present findings align with previous results that reported differences in genetic makeup as the cause of variations in leaf number between onion varieties [57–59].

The application of 123 kg ha<sup>-1</sup> and 82 kg ha<sup>-1</sup> nitrogen resulted in the highest number of leaves per plant (9.82 and 9.61, respectively), whereas plants without nitrogen fertilizer produced the lowest number of leaves per plant (8.63), as indicated in Table 4. Nitrogen is an important nutrient necessary for the synthesis of different protein components that are required for leaf development. In this context, studies by Kokobe et al. [52] have revealed the positive impact of nitrogen on promoting the production of new shoots during the vegetative



growth of plants, which may help increase onion leaf number. The application of nitrogen fertilizer also increased the leaf number of onion plants in different studies [42,44,60–62].

### 3.2. Influences of variety and nitrogen fertilizer on bulb yield and onion quality

The results of the combined analysis indicated that the bulb diameter, average bulb weight, total bulb yield, marketable bulb yield and unmarketable bulb yield were influenced by the main effects of variety and nitrogen rate. However, the interaction effect of variety and nitrogen rate was not significant (S1 Table).

The widest diameter of the onion bulb was recorded from the Russet (69.54 cm) and Jambar (68.53 cm) varieties, whereas the lowest diameter of the bulb (64.56 cm) was recorded from the Bombay Red variety (Table 5).

The widest diameter of the onion bulb was recorded from plots that received 82 kg ha<sup>-1</sup> (73.4 cm) and 123 kg ha<sup>-1</sup> (70.66 cm) onion bulb. On the other hand, the lowest bulb width of 60.44 cm was recorded from the control plot without nitrogen fertilizer. Compared with the control treatment without nitrogen, the application of nitrogen at a rate of 82 kg ha<sup>-1</sup> increased the mean bulb diameter by 21.5% (Table 5). However, a further increase in the nitrogen rate above 82 kg ha<sup>-1</sup> did not affect the mean bulb diameter of the onion. The diameter of the bulb is one of the most important yield components that indicates the yield potential of onion varieties. The parameter is influenced by the genetic makeup of the variety. The greater bulb diameter recorded from the hybrid varieties than from the open pollinated Bombay Red variety in the present study could therefore be attributed to the differences in the genetic makeup of the varieties [63,64]. Similar findings were also reported by Mekdes [65], where the open-pollinated Bombay Red variety presented the lowest bulb diameter. The increase in bulb diameter due to the application of nitrogen fertilizer is clearly associated with the growth-promoting effects of nitrogen, which improve dry matter production in onion plants. An increase in bulb

**Table 5. Influence of variety and nitrogen rate on onion bulb size at three locations.**

| Onion varieties                 | Bulb diameter (cm) | Average bulb weight (g) |
|---------------------------------|--------------------|-------------------------|
| Russet                          | 69.54a             | 93.12a                  |
| Red Coach                       | 65.85b             | 91.16a                  |
| Jambar                          | 68.53ab            | 94.28a                  |
| Bombay Red                      | 64.56c             | 81.7b                   |
| <i>P values</i>                 | **                 | **                      |
| LSD <sub>0.05</sub>             | 3.82               | 3.68                    |
| Nitrogen (kg ha <sup>-1</sup> ) |                    |                         |
| 0                               | 60.44b             | 79.84d                  |
| 41                              | 63.99b             | 85.87c                  |
| 82                              | 73.4a              | 101.18a                 |
| 123                             | 70.66a             | 93.38b                  |
| <i>P values</i>                 | ***                | **                      |
| LSD <sub>0.05</sub>             | 3.82               | 3.19                    |
| CV (%)                          | 12.22              | 8.74                    |

Where

\*\*\* =  $p < 0.001$

\*\* =  $P < 0.01$ ; and Ns =  $P > 0.05$ . Means followed by the same letter within the same column are not significantly different at the 5% probability level: LSD<sub>0.05</sub> = Least significant difference at 5%; and CV = coefficient of variation.

<https://doi.org/10.1371/journal.pone.0312394.t005>

Table 6. Effects of variety and nitrogen on onion bulb yield.

| Onion varieties                      | Marketable bulb yield (t ha <sup>-1</sup> ) | Unmarketable bulb yield (t ha <sup>-1</sup> ) | Total dry bulb yield (t ha <sup>-1</sup> ) |
|--------------------------------------|---------------------------------------------|-----------------------------------------------|--------------------------------------------|
| Russet                               | 26.50a                                      | 0.43c                                         | 26.93a                                     |
| Red Coach                            | 21.84b                                      | 0.50b                                         | 22.35b                                     |
| Jambar                               | 24.57a                                      | 0.51b                                         | 25.09a                                     |
| Bombay Red                           | 19.86b                                      | 0.59a                                         | 20.453b                                    |
| <i>P values</i>                      | ***                                         | ***                                           | ***                                        |
| LSD <sub>0.05</sub>                  | 2.25                                        | 0.43                                          | 2.24                                       |
| Nitrogen rate (kg ha <sup>-1</sup> ) |                                             |                                               |                                            |
| 0                                    | 19.09c                                      | 0.58a                                         | 19.68c                                     |
| 41                                   | 22.39b                                      | 0.51b                                         | 22.91b                                     |
| 82                                   | 26.77a                                      | 0.48b                                         | 27.26a                                     |
| 123                                  | 24.51b                                      | 0.46b                                         | 24.97b                                     |
| <i>P values</i>                      | ***                                         | ***                                           | ***                                        |
| LSD <sub>0.05</sub>                  | 2.25                                        | 0.05                                          | 2.24                                       |
| CV (%)                               | 20.76                                       | 21.43                                         | 20.22                                      |

Where

\*\*\* =  $p < 0.001$

\*\* =  $P < 0.01$ ; and Ns =  $P > 0.05$ . Means followed by the same letter within the same column are not significantly different at the 5% probability level; LSD<sub>0.05</sub> = least significant difference at the 5% probability level; and CV = coefficient of variation.

<https://doi.org/10.1371/journal.pone.0312394.t006>

size through the application of nitrogen has also been reported by different researchers [42,60,66–70].

The hybrid varieties Jambar (94.28 g), Russet (93.12 g) and Red Coach (91.16 g) produced the heaviest bulbs, whereas Bombay Red (81.7 g), an open pollinated variety, as indicated in Table 5.

Similarly, the application of 82 kg ha<sup>-1</sup> nitrogen resulted in the highest bulb weight of onion, whereas the lowest bulb weight was recorded for plants without nitrogen fertilizer. The bulb weight is an important parameter that indicates the yield potential of a given onion variety. In this sense, the hybrid varieties in the present study produced relatively larger bulbs than did the open pollinated variety, which may be associated with their genetic makeup. The results of the present study are consistent with the findings of other researchers who reported that hybrid varieties produced relatively larger bulbs and thus higher bulb yields than did open pollinated onion varieties [49]. Compared with the control without nitrogen, nitrogen supplied at a rate of 82 kg ha<sup>-1</sup> increased the bulb weight by 27%. However, additional applications of nitrogen beyond 82 kg ha<sup>-1</sup> did not result in any significant changes in bulb weight.

The Russet (26.93 t ha<sup>-1</sup>) and Jambar (25.08 t ha<sup>-1</sup>) varieties presented the highest total bulb yields, whereas the Red Coach (25.08 t ha<sup>-1</sup>) and Bombay Red (20.45 t ha<sup>-1</sup>) varieties presented the lowest total bulb yields across the three locations.

The application of 82 kg ha<sup>-1</sup> nitrogen recorded the highest total bulb yield (26.26 t ha<sup>-1</sup>), whereas plants without nitrogen fertilizer recorded the lowest total bulb yield (24.97 t ha<sup>-1</sup>), as indicated in Table 6. High doses of nitrogen result in excessive vegetative growth, which can cause self-shading and a reduction in photosynthesis activities, which in turn reduces the development of storage organs [71,72]. In contrast, a low level of nitrogen causes a reduction in photosynthetic activity associated with a reduction in chlorophyll content [73]. In this context, the application of nitrogen at an appropriate rate is necessary to enhance the leaf area and chlorophyll content and thus increase photosynthetic activity and yield, as indicated in the present study. Compared with the control treatment without nitrogen fertilizer, the application

of 82 kg ha<sup>-1</sup> nitrogen in the present study increased the total onion bulb yield by 38.5%. However, a further increase in the nitrogen rate did not significantly affect the total bulb yield. The yield potential of onion varieties depends on the genetic potential, environmental conditions, and management activities implemented [74,75]. In this sense, the differences in total bulb yield observed in the present study could be attributed to their genetic potential. The highest total bulb yield observed for the Russet and Jambar varieties could be associated with the relatively larger bulbs of the varieties observed in the present study. These findings indicate that these varieties have high nutrient utilization capacity, better adaptability, and high yield performance than do the other onion varieties. These results are in agreement with the findings of other scholars who reported that total bulb yield differences between onion varieties could be attributed to variations in nitrogen fertilizer response and genetic makeup, as well as in the interaction of genotypes and environmental effects [64,76,77]. According to Simon *et al.* [56], proper nutrient management positively contributes to onion production and productivity improvement, especially in areas where nutrient deficiency is critical.

The highest marketable bulb yield was obtained from the Russet (26.50 t ha<sup>-1</sup>) and Jambar varieties (24.57 t ha<sup>-1</sup>). However, the lowest marketable bulb yield was recorded for the Bombay Red variety (19.86 t ha<sup>-1</sup>), which was statistically similar to that of the Red Coach variety.

The onion plants supplied with 82 kg ha<sup>-1</sup> nitrogen produced the highest marketable yield (26.77 t ha<sup>-1</sup>), whereas the plants without nitrogen fertilizer produced the lowest marketable bulb yield (19.09 t ha<sup>-1</sup>) (Table 6). The increased marketable yield of hybrid onion varieties (Russet and Jambar) observed in the present study is clearly due to their genetic potential, as indicated by different scholars who reported marketable bulb yield differences between onion varieties [38,78–80]. Jilani *et al.* [81] and Yemane *et al.* [76] also reported that different onion varieties of the same species produced different yields because of their genetic makeup. Nitrogen fertilizer obviously influences crop yield, including onion yield. The marketable bulb yield of onion varies with the nitrogen fertilizer rate [82]. As illustrated in Fig 2, the marketable

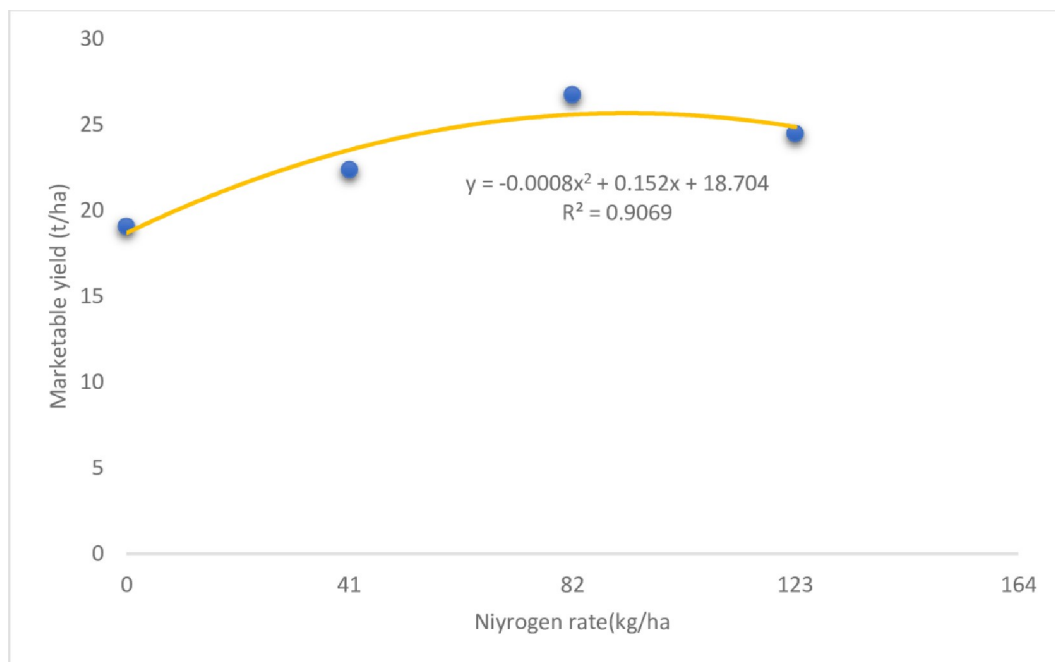

**Fig 2. Effect of nitrogen rate on the marketable bulb yield of onion varieties.**

<https://doi.org/10.1371/journal.pone.0312394.g002>

yield of onion in the present study generally tended to increase and reached a plateau at the 82 kg ha<sup>-1</sup> nitrogen rate, which was found to be optimal for onion production at the study sites. However, a further increase in the nitrogen rate beyond 82 kg ha<sup>-1</sup> did not significantly influence the marketable bulb yield; rather, it resulted in a decreasing trend in the marketable yield.

There was a decreasing trend and negative relationship between marketable bulb yield and plant height (Fig 3A), while an increasing trend and positive slope between marketable bulb yield bulb diameter (Fig 3B), and average bulb weight (Fig 3C).

The Bombay Red onion variety presented the highest unmarketable bulb yield per hectare (0.59 t ha<sup>-1</sup>), whereas the hybrid onion varieties generally produced the lowest unmarketable bulb yield per hectare. Compared with the plots supplied with nitrogen fertilizer, the unfertilized plot also presented the highest unmarketable bulb yield (Table 6), which could be attributed to the application of a suboptimal nitrogen supply that produced poor-quality bulbs that contributed to a higher unmarketable onion yield. This result agrees with the findings of Zeleke *et al.* [47], who reported the highest unmarketable bulb yield from unfertilized plots.

### 3.3. Influence of nitrogen fertilizer on the bulb quality of onion varieties

The analysis of variance revealed that the main effects, as well as the two-way interaction effects of variety and nitrogen, had highly significant ( $p < 0.01$ ) effects on the solid soluble content of onion bulbs. Onion pungency was influenced ( $p < 0.001$ ) by the main effects of variety and nitrogen rate. However, the two-way interaction of nitrogen\*variety did not significantly ( $p > 0.05$ ) influence (S1 Table).

In terms of the interaction effect, the Bombay Red variety received 82 kg ha<sup>-1</sup> nitrogen and 123 kg ha<sup>-1</sup> nitrogen, resulting in the highest TSS levels of 12.36°Brix and 12.16°Brix, respectively (Table 7). Increasing the nitrogen rate improves plant growth and development through increased photosynthetic activities and dry matter production [83], which could also be the case in the present study. In this context, Al-Fraihat [51] reported that increasing the nitrogen fertilizer rate from 100 kg N ha<sup>-1</sup> to 200 kg N ha<sup>-1</sup> increased the TSS from 13.75% to 14.70%. Morsy *et al.* [55] also reported that the application of 120 kg ha<sup>-1</sup> N led to the highest values of TSS, whereas the application of 90 kg nitrogen ha<sup>-1</sup> resulted in the lowest value of TSS. On the other hand, the differences in the TSS values observed in the present study could be attributed to the genetic makeup of onion varieties, as indicated by Chope *et al.* [84]. Generally, high-yield varieties with larger bulb sizes (higher bulb weights) have lower TSS contents than varieties with small bulbs and lower yields [85], which is the case for the Bombay Red variety in the present study.

The highest value of pungency measured as pyruvic acid (10.71 µmol/g) was recorded for the Bombay Red variety, followed by the Russet variety (10.04 µmol/g), whereas the lowest value of pungency was recorded for the Jambar variety (8.541 µmol/g), as indicated in Table 8.

Among the nitrogen fertilizers, the application of 123 kg ha<sup>-1</sup> nitrogen resulted in the highest values of pungency (9.71 µmol/g), which was statistically similar to the results of the application of 82 kg ha<sup>-1</sup> nitrogen (9.51 µmol/g). The bulbs produced without nitrogen fertilizer presented the lowest level (9.45 µmol/g) of pungency (Table 8).

Pungency is one of the most important quality parameters of onion bulbs and is associated with the content of sulfur compounds. Pungency is influenced by onion variety, environmental conditions, and the management practices implemented [86], which is in agreement with the findings of the present study. Like in the present study, Randle [87] reported an increased level of bulb pungency with the application of nitrogen fertilizer, which could be explained by

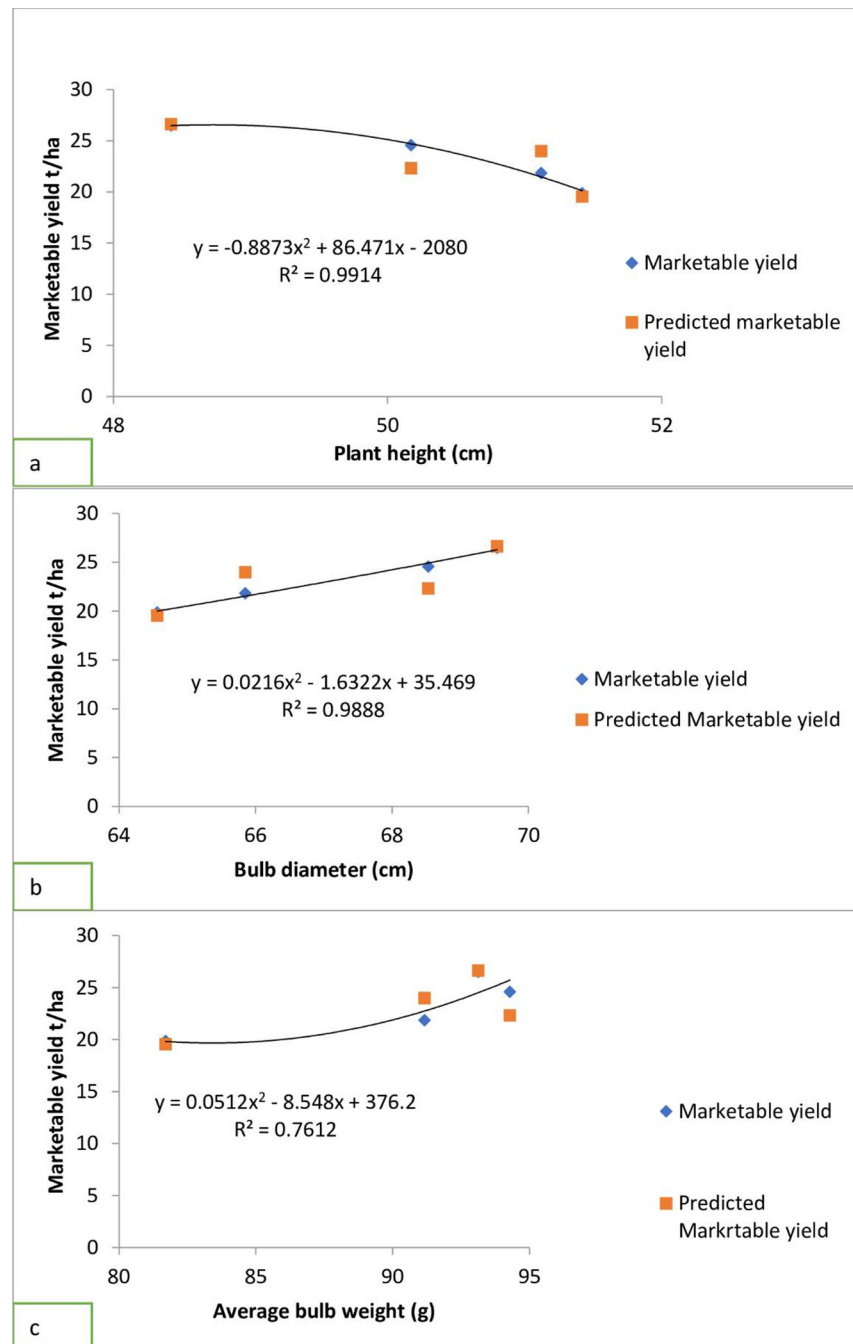

**Fig 3.** Relationship between marketable yield and traits (a) plant height, (b) bulb diameter (c) average bulb weight.

<https://doi.org/10.1371/journal.pone.0312394.g003>

the synthesis and accumulation of sulfur-containing amino acids, which are precursors of flavoring compounds and pyruvate. According to Yoo *et al.* [88] and Gallina *et al.* [89], the pyruvic acid content is influenced by the environment, growing conditions and storage periods. Like in the present study, da Silva *et al.* [86] reported that onion pungency was affected by variety, the growing season and the nitrogen fertilizer rate.

Table 7. TSS of onion varieties influenced by the interaction of variety and nitrogen.

| Varieties           | Nitrogen rate<br>(kg ha <sup>-1</sup> ) | TSS<br>(°Brix)      |
|---------------------|-----------------------------------------|---------------------|
| Russet              | 0                                       | 6.86 <sup>B</sup>   |
|                     | 41                                      | 7.98 <sup>ef</sup>  |
|                     | 82                                      | 7.44 <sup>fg</sup>  |
|                     | 123                                     | 7.70 <sup>fg</sup>  |
| Red Coach           | 0                                       | 7.66 <sup>fg</sup>  |
|                     | 41                                      | 7.90 <sup>efg</sup> |
|                     | 82                                      | 8.10 <sup>ef</sup>  |
|                     | 123                                     | 8.93 <sup>de</sup>  |
| Jambar              | 0                                       | 8.16 <sup>ef</sup>  |
|                     | 41                                      | 9.63 <sup>d</sup>   |
|                     | 82                                      | 9.30 <sup>d</sup>   |
|                     | 123                                     | 9.90 <sup>cd</sup>  |
| Bombay Red          | 0                                       | 10.76 <sup>bc</sup> |
|                     | 41                                      | 11.07 <sup>b</sup>  |
|                     | 82                                      | 12.36 <sup>a</sup>  |
|                     | 123                                     | 12.16 <sup>a</sup>  |
| <i>P values</i>     |                                         | **                  |
| LSD <sub>0.05</sub> |                                         | 1.06                |
| CV(%)               |                                         | 9.00                |

Where

\*\*\* =  $p < 0.001$

\*\* =  $P < 0.01$ ; and Ns =  $P > 0.05$ . Means followed by the same letter within the same column are not significantly different at the 5% probability level; LSD<sub>0.05</sub> = least significant difference at the 5% probability level; and CV = coefficient of variation.

<https://doi.org/10.1371/journal.pone.0312394.t007>

### 3.4. Economic analysis of onion as influenced by variety and nitrogen fertilizer rate

The partial budget analysis indicated that the application of 82 kg ha<sup>-1</sup> nitrogen fertilizer (474,745 ETB ha<sup>-1</sup>) and Russet (413,000 ETB ha<sup>-1</sup>) and Jambar (378,260 ETB ha<sup>-1</sup>) varieties across the three locations resulted in relatively high net benefits (Table 9). As shown in Fig 2, the application of 82 kg ha<sup>-1</sup> nitrogen resulted in the highest bulb yield and the highest net return (Fig 4). An additional increase in the nitrogen rate beyond 82 kg ha<sup>-1</sup> reduced the net return of onion (Fig 4), which could be considered optimal for onion production in the study area.

## 4 Conclusions and recommendations

The onion growth and yield parameters were influenced by the nitrogen fertilizer rate and variety across the three locations. Compared with the open pollinated Bombay Red variety, the hybrid varieties (Russet and Jambar) performed well in terms of bulb diameter, bulb weight, total yield, and marketable bulb yield parameters. In general, the highest growth and yield parameters of onion were recorded when nitrogen fertilizer was supplied at a rate of 82 kg ha<sup>-1</sup>. The onion plants supplied with 82 kg ha<sup>-1</sup> nitrogen recorded the highest marketable bulb yield of 26.77. The experiment indicated that too much N (above 82 kg ha<sup>-1</sup>) leads to decreased yield; hence, excess N is lost to the environment.



Table 8. Effects of variety and nitrogen on onion bulb pungency across the three locations.

| Treatment                            | Pungency ( $\mu$ mol./g) |
|--------------------------------------|--------------------------|
| Russet                               | 10.04 <sup>b</sup>       |
| Red Coach                            | 8.82 <sup>c</sup>        |
| Jambar                               | 8.541 <sup>c</sup>       |
| Bombay Red                           | 10.71 <sup>a</sup>       |
| Significance level                   | ***                      |
| LSD <sub>0.05</sub>                  | 0.35                     |
| Nitrogen rate (kg ha <sup>-1</sup> ) |                          |
| 0                                    | 9.45 <sup>b</sup>        |
| 41                                   | 9.45 <sup>b</sup>        |
| 82                                   | 9.52 <sup>ab</sup>       |
| 123                                  | 9.71 <sup>a</sup>        |
| <i>P values</i>                      | **                       |
| LSD <sub>0.05</sub>                  | 0.34                     |
| CV (%)                               | 9.8                      |

Where

\*\*\* =  $p < 0.001$

\*\* =  $P < 0.01$ ; and Ns =  $P > 0.05$ . Means followed by the same letter within the same column are not significantly different at the 5% probability level; LSD<sub>0.05</sub> = least significant difference at the 5% probability level; and

CV = coefficient of variation.

<https://doi.org/10.1371/journal.pone.0312394.t008>

The Russet and Jambar varieties recorded the highest marketable bulb yields, with values of 26.50 t ha<sup>-1</sup> and 24.57 t ha<sup>-1</sup>, respectively. The Russet and Jambar varieties and the 82 kg ha<sup>-1</sup> nitrogen rate also recorded the greatest net benefit across all three locations. Given the significant economic benefits associated with their higher marketable yields, Russet and Jambar are recommended for production, particularly in northwest Amhara, where yield is prioritized. Therefore, Jambar and Russet varieties and the application of 82 kg ha<sup>-1</sup> nitrogen fertilizer, are recommended for the economical production of onions in areas of the study area with similar agroecology. Since this study was the first of its kind in the study area, other hybrid onion

Table 9. Partial budget analysis for onion production as influenced by variety and nitrogen fertilizer level across the three locations.

| Treatments                           | MY (t ha <sup>-1</sup> ) | AMY (t ha <sup>-1</sup> ) | GB (Birr/ha) | TVC (Birr/ha) | Net benefit (Birr/ha) | Dominance analysis | MRR (%)  |
|--------------------------------------|--------------------------|---------------------------|--------------|---------------|-----------------------|--------------------|----------|
| Variety                              |                          |                           |              |               |                       |                    |          |
| Bombay Red                           | 19.86                    | 17.874                    | 357480       | 18000         | 339480                |                    | -        |
| Jambar                               | 24.57                    | 22.113                    | 442260       | 64000         | 378260                |                    | 84.3     |
| Russet                               | 26.5                     | 23.85                     | 477000       | 64000         | 413000                |                    | 159.83   |
| Red Coach                            | 21.84                    | 19.656                    | 393120       | 64000         | 329120                | <b>D</b>           | -        |
| Nitrogen rate (kg ha <sup>-1</sup> ) |                          |                           |              |               |                       |                    |          |
| 0                                    | 19.09                    | 17.181                    | 343620       | 0             | 343620                | -                  | -        |
| 41                                   | 22.39                    | 20.151                    | 403020       | 3557.6        | 399462                |                    | 1569.665 |
| 82                                   | 26.77                    | 24.093                    | 481860       | 7115.2        | 474745                |                    | 2116.101 |
| 123                                  | 24.51                    | 22.059                    | 441180       | 10672.8       | 430507                | <b>D</b>           | -        |

Note: MY = marketable yield; AMY = adjusted marketable yield; GB = gross benefit, TVC = total variable cost, NB = net benefit; D = dominated and MRR = marginal rate of return.

<https://doi.org/10.1371/journal.pone.0312394.t009>

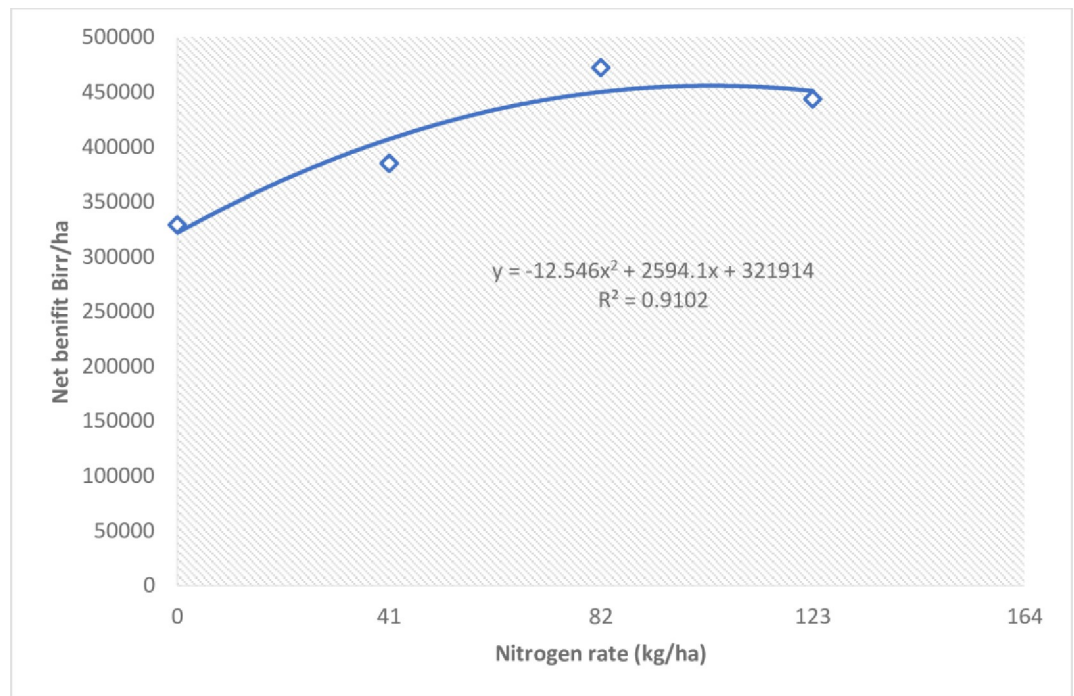

**Fig 4.** Polynomial curve fit and regression equation illustrating the relationship between nitrogen rate (kg/ha) and net benefit (Birr/ha).

<https://doi.org/10.1371/journal.pone.0312394.g004>

varieties should be considered, and agronomic practices such as spacing and phosphorous fertilizer should be optimized in future research. In addition, further research is required to enhance the quality characteristics of the high yielding varieties.

## Supporting information

**S1 Table.** Mean squares and significance level for onion traits tested.  
(DOCX)

**S1 Data.**  
(XLS)

## Author Contributions

**Conceptualization:** Yebirzaf Yesiwas, Melkamu Alemayehu.

**Data curation:** Yebirzaf Yesiwas.

**Investigation:** Yebirzaf Yesiwas.

**Methodology:** Melkamu Alemayehu, Enyew Adgo.

**Software:** Yebirzaf Yesiwas.

**Supervision:** Melkamu Alemayehu, Enyew Adgo.

**Validation:** Melkamu Alemayehu.

**Writing – original draft:** Yebirzaf Yesiwas.

**Writing – review & editing:** Melkamu Alemayehu, Enyew Adgo.

## References

1. Cramer CS, Breeding and genetics of Fusarium basal rot resistance in onion. *Euphytica*. 2000; 115: 159–166.
2. Mamiro DP, Maerere AP, Sibuga KP, Ebaugh MJ, Miller SA, Mtui HD, et al. Local community's knowledge on onion production, pests and pests' management in Kilosa and Kilolo Districts, Tanzania. *Tanzania Journal of Agricultural Sciences*. 2014; 13(2).
3. Dessalegn Lemma, Aklilu Shimeles, Research Experiences in Onion production. 2003; Research Report No. 55. Ethiopia Agricultural Research Organization. Addis Ababa <http://publication.eiar.gov.et:8080/xmlui/bitstream/handle>.
4. Raemaekers HR, Crop Production in Tropical Africa. DGIC Ministry of Foreign Affairs, External Trade and International co-operation, Brussels, Belgium. 2001; pp 455.
5. Sharma K, Assefa AD, Kim S, Ko EY, Lee ET, Park SW, Evaluation of total phenolics, flavonoids and antioxidant activity of 18 Korean onion cultivars: a comparative study. *Journal of the Science of Food and Agriculture*. 2014; 94(8), pp.1521–1529. <https://doi.org/10.1002/jsfa.6450> PMID: 24136245
6. Renbomo N, Biswas PK, Effect of plant and row spacing on growth and yield of onion under Mokochung district of Nagaland. *International Journal of Plant Sciences (Muzaffarnagar)*. 2017; 12(1): pp.28–35.
7. FAOSTAT, Food and Agriculture Organization of the United Nations. 2020; FAOSTAT database.
8. Food and Agriculture Organization of the United Nations (FAO), 2022; FAOSTAT database. <http://www.fao.org/faostat/en/> [Accessed March 16, 2024].
9. Central statistical agency (CSA), Area, production and productivity of major horticultural crops Meher season, Addis Ababa. 2020.
10. Yideg Agumas, Determinants of Onion Production in Fogera District, South Gondar Zone MSc Thesis, Gonder Univeristy, Gonder, Ethiopia. 2019.
11. Yeshiwas Y, Alemayehu M, Adgo E, The rise and fall of onion production; its multiple constraints on pre-harvest and post-harvest management issues along the supply chain in northwest Ethiopia. *Heliyon* 2023; 9(5). <https://doi.org/10.1016/j.heliyon.2023.e15905> PMID: 37215801
12. Megersa Habtamu Gudisa, Onion (*Allium cepa* L.) yield improvement progress in Ethiopia: A review. *Inter J Agri Biosci*. 2017; 6(5): 265–271.
13. Singh KR, Bhonde SR, Performance studies of exotic onion (*Allium cepa* L.) hybrids in the Nashik region of Maharashtra. *Indian Journal of Hill Farming*. 2011; 24(2):9–31.
14. Meer VDQP, Onion hybrids evaluation, prospects, limitations and methods. *Alliums for the tropics*. *Acta Horticulturae*. 1994; 358.
15. Hyde PT, Practical testing of onion hybrids featuring novel botrytis leaf blight resistance or doubled haploid parents. MSc thesis. Cornell University. 2010.
16. Lee KA, Kim KT, Kim HJ, Chung MS, Chang PS, Park H, et al. Antioxidant activities of onion (*Allium cepa* L.) peel extracts produced by ethanol, hot water, and subcritical water extraction. *Food Science and Biotechnology*. 2014; 23: 615–621. <https://doi.org/10.1007/s10068-014-0084-6>
17. Brewster JL, Onions and Other Vegetable Alliums. Wallingford, CAB International. 1994.
18. Brewster JL, Onions and other vegetable alliums (No 15). Wallingford, CAB International CABI. 2008.
19. Yoldas F, Ceylan S, Mordogan N, Esetlili BC, Effect of organic and inorganic fertilizers on yield and mineral content of onion (*Allium cepa* L.). *African Journal of Biotechnology*. 2011; 10: 11488–11492.
20. Agnieszka S, Robert P, Del VL, Silvano S, Gianluca C, Interactions among genotype, environment and agronomic practices on production and quality of storage onion (*Allium cepa* L.)—A review. *J Hort Sci Biotech*. 2017; 44:21–42.
21. Dinega TM, Haile A, Beshir H, Improving onion productivity and producer income through nitrogen management. *Adv. Hort. Sci*. 2023; 37(3): 317–327 <https://doi.org/10.36253/ahsc-13944>
22. Khokhar KM, Part 1 Onion Bulb Development, Chapter 4 Soil and nutrition. *Onion An Ancient Crop and Modern Practices-A Review*. Noor Publishing, Pakistan. 2019.
23. Aliyu U, Dikko AU, Magaji MD, Sing A, Nitrogen and Intra-row Spacing Effect on Growth and yield of Onion (*Allium cepa* L.). *J. PlantSci*. 2008; 3(3):188–193 ISSN 1816-4951.
24. Khan IU, Jilani M S, Nadeem MA, Kiran M, Jilani TA, Saleem H, Impact of N-fertilization on onion bulb production of different genotypes through onion-set. - *Inter. J. Emerging Techn*. 2021; 12(2): 161–154.
25. Geary B, Clark J, Hopkins BG, Jolley VD, Deficient, adequate and excess nitrogen levels established in hydroponics for biotic and abiotic stress-inter-action studies in potato. - *J. Plant Nutr*. 2015; 38(1): 41–50.

26. Buckland K, Reeve JR, Alston D, Nischwitz C, Drost D, Effects of nitrogen fertility and crop rotation on onion growth and yield, thrips densities, Iris yellow spot virus and soil properties. *Agriculture, ecosystems & environment*. 2013; 177: pp.63–74.
27. Regional Meteorological Station, 2022.
28. MoARD, Directory of Released Crop Varieties and their Recommended Cultural Practices. Ethiopian Agricultural Research Organization, Addis Abeba, Ethiopia. 2004.
29. MoARD, Plant Variety Release, Protection and Seed Quality Control Directorate Crop Variety Register. 2016; Issue No. 19 Ministry of Agriculture: Addis Ababa, Ethiopia.
30. MoARD, Plant Variety Release, Protection and Seed Quality Control Directorate Crop Variety Register. 2019. Issue No. 22 June, 2019; Ministry of Agriculture: Addis Ababa, Ethiopia.
31. Olani Nikus and Fikre Mulugeta, Onion seed production techniques. A manual for extension agents and seed producers, Asella, Ethiopia. 2010. p1.
32. IPGRI, ECP/GR, AVRDC, Descriptors for *Allium* (*Allium* spp.). International Plant Genetic Resources Institute, Rome, Italy; European Cooperative Programme for Crop Genetic Resources Networks (ECP/GR), Asian Vegetable Research and Development Center, Taiwan. 2001.
33. Waskar DP, Khedlar RM, Garande V, K, Effect of postharvest treatment on shelf life and quality of pomegranate in evaporative cool chamber and ambient conditions. *Journal of Food Science and Technology*. 1999. 2(36): 114–117.31.
34. Anthon GE, Barrett D, M, Modified method for the determination of pyruvic acid with dinitrophenylhydrazine in the assessment of onion pungency. *Journal of the Science of Food and Agriculture J Sci Food Agric*. 2003. 83:1210–1213. <https://doi.org/10.1002/jsfa.1525>
35. Gomez KA, Gomez AA, Statistical procedures for agricultural research. National rice research institute, John Wiley and Sons, New York. 1984; pp. 188–260.
36. CIMMYT, From Agronomic Data to Farmer Recommendations: An Economics Training Manual. Completely revised edition. Mexico.D.F. 1988.
37. Kahsay Yemane, Belew Derbew, Abay Fetien, Effects of intra-row spacing on plant growth and yield of onion varieties (*Allium cepa* L.) at Aksum, Northern Ethiopia. *Afr. J. Agric. Res*. 2014; Vol. 9 (10): pp931–940.
38. Gebretsadkan Gebremedhn, Gebremicael Yohanes, Asgele Kiros, Abebe Eyasu, Gebrelibanos Weldegerima, Tsehay Yrgalem, Enhancing productivity and production of onion through use of improved varieties at North Western Zone of Tigray, Ethiopia. *International Journal of Environment Agriculture and Biotechnology*. 2018; 3 (3): pp.0756–0762.
39. Fikre G, Mensa A, Adaptation and evaluation of improved onion (*Allium cepa*) varieties at Arba Minch, Southern Ethiopia. *Asian J. Plant Sci. Res*. 2021; 11(8): pp.264–268.
40. Krshnappa, Effect of fertilizer applications on the dry matter and N, P, and K accumulation in the potato at different stages of growth. *Mysore Journals of Agricultural science*. 1989; 18(11): 158–160.
41. Sorensen JN, Grevsen K., Sprouting in bulb onions (*Allium cepa* L.) as influenced by nitrogen and water stress. *The Journal of Horticultural Science and Biotechnology*. 2001; 76(4): pp.501–506.
42. Yohanes Abdissa, Tsegaw Tekalign and Pant LM Growth, yield and quality of onion as influenced by nitrogen and phosphorus fertilizer. Growth attributes biomass production and bulb yield. *African Journal of Agricultural Research*. 2011; 6 (14):3252–3258.
43. Kebede Woldetsadik, Shallot (*Allium cepa* var. *ascalonicum*) responses to plant nutrients and soil moisture in a Sub-humid Tropical Climate. Doctoral dissertation. 2003; ISSN 1401-6249, ISBN 91-576-6195-2.
44. Ibrahim ND, Growth and yield of Onion (*Allium cepa* L.) in Sokoto, *Nigeri. Agric. Biol.J. North America*. 2010; 1 (4):556–564.
45. Ahmed AK, Ali ES, Fathalla HF, Effect of transplanting dates of onion cultivars on vegetable growth, yield and its quality. *ESci Journal of Crop Production*. 2013; 02 (03): 72–82.
46. Azoom AAA, Zhani K, Hannachi C, Performance of eight varieties of onion cultivated under open field in Tunisia. *Notulae Scientia Biologicae*. 2014; 6(2): 220–224.
47. Zeleke AA, Limeneh DF, Galalcha DT, Tilahun GW, Hunde NF, Mengistu FG. Performance and Adaptability Evaluation of Improved Onion Varieties (*Allium cepa* L.) for Bulb Yield and Some Agronomic Traits. *American Journal of Bio Science*. 2021; 9(3):105–109.
48. Cramer CS, Comparison of Open-pollinated and Hybrid Onion Varieties for New Mexico. New Mexico State University. 1999.
49. Cramer CS, Comparison of open-pollinated and hybrid onion varieties for New Mexico. 2018. (<https://onion.nmsu.edu/documents/hybridvigor.pdf>).

50. Rizk FA, Shaheen AM, Abd El-Samad EH, Sawan OM, Effect of different nitrogen plus phosphorus and sulfur fertilizer levels on growth, yield and quality of onion (*Allium cepa* L.). *Journal of Applied Science Research*. 2012; 8 (7):3353–3361.
51. Al-Fraihat AH, Effect of different nitrogen and sulphur fertilizer levels on growth, yield and quality of onion (*Allium cepa* L.). *Jordan Journal of Agricultural Science*. 2009; 5(2):155–166.
52. Kokobe W Yohannes, Derbew Belew, Adugna Debela, Effect of farmyard manure and nitrogen fertilizer rates on growth, yield and yield components of onion (*Allium cepa* L.) at Jimma, southwest Ethiopia. M. Sc. THESIS. 2012.
53. Gessesew Weldemariam Seifu, Woldetsadik Kebede, Mohammed Wassu. Growth Parameters of Onion (*Allium cepa* L.) as Affected by Nitrogen Fertilizer Rates and Intra-row Spacing under Irrigation in Gode, South-East Ethiopia. *Agriculture, Forestry and Fisheries*. 2015; Vol. 4, No. 6: pp. 239–245.
54. Nasreen S, Haque MM, Hossain MA, Farid ATM, Nutrient uptake and yield of onion as influenced by nitrogen and sulfur fertilization. *Bangladesh Journal of Agricultural Research*. 2007; 32(3):413–420.
55. Morsy MG, Marey RA, Karam SS, Abo-Dahab AM, Productivity and storability of onion as influenced by the different levels of NPK fertilization. *Journal of Agricultural Research Kafer El-Sheikh University*. 2012; 38(1):171–186.
56. Tibebu Simon, Me lese Tora, Shumbulo Abraham, Samuel Urkato, Effect of variety, nitrogen and phosphorus fertilization on growth and bulb yield of onion (*Allium Cepa* L.) at Wolaita, Southern Ethiopia. *J Biol Agric Health care*. 2014; 4: 89–96.
57. Boukary H, Haougui A, Barage M, Adam T, Roumba A, Saadou M, Evaluation for agro-morphology of onion varieties under ecotypes of Nigeria. *International Journal of Biological and Chemistry Science*. 2012; 6(6): 3098–3106.
58. Ijoyah MO, Rakotomavo H, Naiken MV, Yield performance of four onion (*Allium cepa* L.) cultivars compared with the local variety under open field conditions at Anse Boileau. *Seychelles Journal of Science and Technology*. 2008; 28(3):28–33.
59. Bedada GB, Dechassa N, Effect of Nitrogen Application on Growth, Yield, and Shelf-Life of Onion (*Allium Cepa* L.) Varieties in Fedis District, Eastern Harerge Zone, Ethiopia (Doctoral dissertation, Haramaya University). 2014.
60. Guesh Tekle, Growth, yield, and quality of onion (*Allium cepa* L.) as influenced by intra-row spacing and nitrogen fertilizer levels in central zone of Tigray, northern Ethiopia. The MSc Thesis, College of Agriculture and Environmental Sciences School of Plant Sciences, Post Graduate Directorate Haramaya University. 2015.
61. Fitsum Gebregwergis, Woldetsadik Kebede, Alemayhu Yibekal, Effect of Irrigation Depth and Nitrogen Levels on Growth and Bulb Yield of Onion (*Allium cepa* L.) at Algae, Central Rift Valley of Ethiopia. *International Journal of Life Sciences*. 2016; 5(3):152–162.
62. Merawie Alebachew, Alemayehu Melkamu, Masrie Biruk, Optimal Rate of Nitrogen and Intra Row Spacing For Economical Production of Onion Under Irrigated Farming System in Eastern Amhara Region, Ethiopia. *Current R. A. Scie*. 2019; Vol. 6. 2: 83–94.
63. Jilani MS, Khan MQ, Rahman S, Planting densities affect on yield and yield components of onion (*Allium cepa* L.). *Journal of Science Agricultural Research*. 2009; 47(4):397–404.
64. Rageb ME, Shaheen AM, Fatma A, Mahmoud S, Nadia M, Soleymani MM, Effect of Planting Dates and NPK Fertilizer Levels on Onion Seeds Production. 2018.
65. Mekdes Aakelt, Influence of intra-row spacing on plant growth, yield and quality of onion (*Allium cepa* L.) varieties at Dawro, Southwestern Ethiopia. The MSc Thesis, School of Graduate Studies, Jimma University College of Agriculture and Veterinary Medicine. 2012.
66. Bekele M, Mohammed A, Nebiyu A, Quality and storage life of onion (*Allium cepa* L.) as influenced by applications of nitrogen, phosphorus and potassium fertilizer, at Jimma, South Western Ethiopia. *J Nat Sci Res*. 2018; 8, pp.31–44.
67. Tekeste N, Dechassa N, Woldetsadik K, Dessalegne L, Takel A, Influence of Nitrogen and Phosphorus Application on Bulb Yield and Yield Components of Onion (*Allium cepa* L.). *The Open Agriculture Journal*. 2018; 12:194–206.
68. Bezabih TT and Girmay S, Nutrient use efficiency and agro-economic performance of onion (*Allium cepa* L.) under combined applications of N, K and S nutrients. *Vegetos*. 2020; 33(1) 117–27.
69. Piri H, Naserin A, Effect of different levels of water, applied nitrogen and irrigation methods on yield, yield components and IWUE of onion. *Scientia Horticulturae*. 2020; 268, p.109361.
70. Shura G, Beshir HM, Haile A, Improving onion productivity through optimum and economical use of soil macronutrients in Central Rift Valley of Ethiopia. *Journal of Agriculture and Food Research*. 2022; 9, p.100321.



71. Khan H, Khan MA, Shah Z, Ali A, Ali Z, Nutrient management in potato production. Potato and Tomato Newsletter, 2011; 57(3), 18–22. <https://link.springer.com/article/10.1007/s11540-019-09431-2>.
72. Wang R, Li M, Wu S, Yang Q, Li S, (Effect of Nitrogen Application Rate on Growth and Photosynthesis of Tomato Plants. Plants. 2020; 9(7): 905. <https://www.mdpi.com/2073-4395/13/6/1550>.
73. Girardan P, Tollennar M, Muldoon JF, Photosynthetic rate and chlorophyll content. Canadian Journal of Plant Science. 1985; 65:491–500.74.
74. Mnzava AM, Ng'ondi M W, Kabasa JD, Comparative Performance of Some Onion (*Allium cepa* L.) Cultivars under Different Levels of Nitrogen Fertilizer and Irrigation. International Journal of Agricultural Science. 2013; 3(9), 1011–1017. <https://www.mdpi.com/2311-7524/9/3/344>.
75. Singh M, Kumar S, Singh D, Singh AK, Singh R, Estimation of Genotype × Environment Interaction for Yield and Yield-Related Traits in Onion (*Allium cepa* L.) Cultivars. Indian Journal of Agricultural Sciences. 2015; 85(1), 94–98. <https://www.hindawi.com/journals/aag/2021/3786945/>.
76. Kahsay Yemane, Belew D, Abay F, 2013. Effect of intra-row spacing on yield and quality of some onion varieties (*Allium cepa* L.) at Aksum, Northern Ethiopia. *African Journal of Plant Science*. 2013; 7 (12), pp.613–622.
77. Walle Tegebew, Dechassa Nigussie, W/Tsadik Kebede, Yield and Yield Components of Onion (*Allium cepa* var. *cepa*) Cultivars as Influenced by Population Density at Bir Sheleko, North-Western Ethiopia. Academic Research Journal of Agricultural Science and Research. 2018; Vol. 6(3): pp. 172–192.
78. Awasa Geremew, Abdisa Teshome, Tolesa Kasaye, Chali Amenti, Effect of intra-row spacing on yield of three onion (*Allium cepa* L.) varieties at Adami Tulu agricultural research center (mid rift valley of Ethiopia). Journal of Horticulture and Forestry. 2010; Vol. 2(1): pp. 007–011.
79. Kidan Hailu Dinka, Akililu M Makonnen, Mikael T Yimenu, An investigation on the influence of intra-row spacing and variety on yield and shelf life of onion. Arba Minch, Ethiopia. International Journal of Agricultural Sciences. 2015; 5 (3):559–567.
80. Alemu D, Kitila C, Garedew W, Jule L, Badassa B, Nagaprasad N, et al. Growth, yield, and yield variables of onion (*Allium Cepa* L.) varieties as influenced by plantspacing at DambiDollo, Western Ethiopia. *Scientific Reports*. 2022; 12(1): p.20563.
81. Jilani MS, Ghaffoor A, Waseem K Farooqi JI, Effect of different levels of nitrogen on growth and yield of three onion varieties. *International Journal of Agriculture and Biology*. 2004; 6 (3):507–510.
82. Gebretsadik Kiros, Dechassa Nigussie, Effect of nitrogen fertilizer rates and intra row spacing on bulb yield of onion (*Allium cepa* L.) at Shire, Northern Ethiopia. *International Journal of Science and Research*. 2016; 5(10): pp.1769–1772.
83. Brady NC, The Nature and Properties of Soils, 9th Edn. New Delhi. 1985.
84. Chope GA, Terry LA, White PJ, Effect of controlled atmosphere storage on abscisic acid concentration and other biochemical attributes of onion bulbs. *Postharv. Biol. Technol.* 2006; 39: 233–242.
85. Mallor C, Balcells M, Sales E, The Genetic variation for bulb size, soluble solids content and pungency content in the Spanish sweet onion variety Fuentes de Ebro. Response to selection for low pungency. *Plant Breeding*. 2011; 130:55–59.
86. da Silva ALBR, Rodrigues C, Dunn L, Cavender G, Coolong T, Fertilizer Nitrogen Application for Short-Day Onion Production: From Field to Table. *Horticulturae*. 2022; 8(9), p.847.
87. Randle WM, increasing nitrogen concentraton in hydroponic solutions affets onion flavour and bulb quality. *J.Amer.Soc.Hort.Sci.* 2000; 125:254–259.
88. Yoo KS, Pike L, Crosby K, Jones R, Leskovar D, Differences in onion pungency due to cultivars, growth environment, and bulb sizes. *Sci Hort.* 2006; 110: 144–149.
89. Gallina PM, Cabassi G, Maggioni A, Natalini A, Ferrante A, Changes in the pyruvic acid content correlates with phenotype traits in onion clones. *Australian Journal of Crop Science*. 2012; 6(1), pp.36–40.
